# Supplementary material for: Off-fault damage controls near-surface rupture behaviour in soft sediments
Source: Research Square preprint supplement (doi:10.21203/rs.3.rs-5478683/v1), 2024-11-24
Supplement: Supplementary file 2 [file f92e0ce0e36ecb627a446846.pdf]

## Supplementary Table I

### 1 MPa, high-velocity friction results

| Exp. #                 | $\mu_p$ | $\mu_r^*$ | $\mu_{ss}$ | $D_w$ (m) | Final displacement (m) |
|------------------------|---------|-----------|------------|-----------|------------------------|
| <u>Room-humidity</u>   |         |           |            |           |                        |
| 512                    | 1.1358  | 0.6224    |            |           | 7.53                   |
| 513                    | 1.1263  | 0.5416    |            |           | 13.46                  |
| 514                    | 1.2848  |           | 0.3996     | 19.2      | 26.68                  |
| 532                    | 1.2348  |           | 0.3784     | 21.3      | 36.77                  |
| <u>Brine-saturated</u> |         |           |            |           |                        |
| 516                    | 0.9423  |           |            |           | 16.72                  |
| 517                    | 0.7243  |           | 0.3155     | 16.7      | 30.02                  |
| 535                    | 0.8511  |           | 0.2174     | 16.5      | 33.35                  |

\*  $\mu_r$  = the residual friction value, reported for experiments terminated before steady-state sliding was fully established

### 9 MPa, high-velocity friction results

| Exp. #                 | $\mu_p$ | $\mu_{ss}$ | $D_w$ (m) | Final displacement (m) |
|------------------------|---------|------------|-----------|------------------------|
| <u>Room-humidity</u>   |         |            |           |                        |
| 523                    | 0.8079  | 0.2322     | 0.56      | 1.005                  |
| 624                    | 0.7865  | 0.2035     | 1.67      | 4.579                  |
| <u>Brine-saturated</u> |         |            |           |                        |
| 525                    | 0.2966  | 0.0963     | 0.013     | 1.732                  |
| 626                    | 0.3534  | 0.1117     | 0.053     | 1.214                  |
| 627                    | 0.3575  | 0.1048     | 0.057     | 1.066                  |

### 18 MPa, high-velocity friction results

| Exp. #                 | $\mu_p$ | $\mu_{ss}$ | $D_w$ (m) | Final displacement (m) |
|------------------------|---------|------------|-----------|------------------------|
| <u>Room-humidity</u>   |         |            |           |                        |
| 519                    | 0.753   | 0.1579     | 0.29      | 0.7193                 |
| <u>Brine-saturated</u> |         |            |           |                        |
| 521                    | 0.2886  | 0.0783     | 0.033     | 2.248                  |

**Supplementary Table I.** Summary of high velocity friction experiment results.  $\mu_p$  = Peak friction;  $\mu_{ss}$  = Steady-state friction;  $D_w$  = Slip weakening distance (See main text and Supplementary Information III for details).

## Supplementary Table II

| LIF 1.1 - Hanging-wall damage zone - Hybrid shear fractures     |            |             |             |                   |                                       |
|-----------------------------------------------------------------|------------|-------------|-------------|-------------------|---------------------------------------|
| Distance (cm)                                                   | Width (mm) | Length (cm) | Orientation | Displacement (mm) | Fracture energy (MJ m <sup>-2</sup> ) |
| 0                                                               | 10         | 120         | 001/72      | 30                | 0.11655                               |
| 60                                                              | 1          | 80          | 328/71      | 1                 | 0.005135                              |
| 130                                                             | 5          | 300         | 342/70      | 20                | 0.0857                                |
| 165                                                             | 10         | 350         | 110/68      | 1                 | 0.005135                              |
| 175                                                             | 5          | 150         | 340/70      | 1                 | 0.005135                              |
| 255                                                             | 2          | 320         | 124/88      | 3                 | 0.015105                              |
| 286                                                             | 1          | 25          | 345/75      | 3                 | 0.015105                              |
| 333                                                             | 1          | 140         | 130/83      | 2                 | 0.01017                               |
| 366                                                             | 1          | 160         | 330/65      | 2                 | 0.01017                               |
| 590                                                             | 1          | 220         | 145/87      | 1                 | 0.005135                              |
| 675                                                             | 1          | 300         | 140/65      | 2                 | 0.01017                               |
| 1493                                                            | 10         | 550         | 328/86      | 20                | 0.0857                                |
| LIF 1.1 - Hanging-wall damage zone - Disaggregation shear bands |            |             |             |                   |                                       |
| Distance (cm)                                                   | Width (mm) | Length (cm) | Orientation | Displacement (mm) | Fracture energy (MJ m <sup>-2</sup> ) |
| 0                                                               | 1          | 20          | 116/61      | 30                | 0.11655                               |
| 30                                                              | 1          | 50          | 253/39      | 20                | 0.0857                                |
| 35                                                              | 1          | 40          | 254/38      | 10                | 0.04735                               |
| 50                                                              | 1          | 15          | 104/60      | 10                | 0.04735                               |
| 60                                                              | 1          | 100         | 240/40      | 45                | 0.145575                              |
| 60                                                              | 1          | 30          | 265/32      | 8                 | 0.03868                               |
| 60                                                              | 1          | 10          | 250/32      | 30                | 0.11655                               |
| 60                                                              | 1          | 10          | 090/45      | 18                | 0.07893                               |
| 272                                                             | 2          | 50          | 330/52      | 10                | 0.04735                               |
| 290                                                             | 10         | 50          | 320/50      | 70                | 0.1551                                |
| LIF 1.1 - Foot-wall damage zone - Hybrid shear fractures        |            |             |             |                   |                                       |
| Distance (cm)                                                   | Width (mm) | Length (cm) | Orientation | Displacement (mm) | Fracture energy (MJ m <sup>-2</sup> ) |
| 0                                                               | 3          | 120         | 335/84      | 3                 | 0.015105                              |
| 155                                                             | 20         | 250         | 046/84      | 65                | 0.1551                                |
| 180                                                             | 2          | 400         | 036/85      | 70                | 0.1551                                |
| 205                                                             | 1          | 30          | 265/90      | 2                 | 0.01017                               |
| 220                                                             | 3          | 350         | 002/80      | 6                 | 0.02961                               |
| 270                                                             | 1          | 50          | 023/39      | 1                 | 0.005135                              |
| 290                                                             | 2          | 40          | 328/72      | 2                 | 0.01017                               |
| 330                                                             | 1          | 40          | 335/79      | 1                 | 0.005135                              |
| 360                                                             | 1          | 15          | 026/86      | 1                 | 0.005135                              |
| 395                                                             | 10         | 160         | 286/90      | 2                 | 0.01017                               |
| 413                                                             | 8          | 350         | 010/86      | 3                 | 0.015105                              |
| 535                                                             | 15         | 220         | 096/82      | 10                | 0.04735                               |
| 535                                                             | 15         | 100         | 096/82      | 10                | 0.04735                               |
| 535                                                             | 15         | 120         | 078/88      | 10                | 0.04735                               |
| 535                                                             | 15         | 70          | 078/88      | 10                | 0.04735                               |
| 540                                                             | 1          | 25          | 274/70      | 3                 | 0.015105                              |
| LIF 1.1 - Foot-wall damage zone - Disaggregation shear bands    |            |             |             |                   |                                       |
| Distance (cm)                                                   | Width (mm) | Length (cm) | Orientation | Displacement (mm) | Fracture energy (MJ m <sup>-2</sup> ) |
| 0                                                               | 1          | 30          | 043/80      | 65                | 0.1551                                |
| 0                                                               | 1          | 40          | 209/10      | 65                | 0.1551                                |
| 25                                                              | 20         | 25          | 194/35      | 25                | 0.102125                              |
| 25                                                              | 1          | 6           | 204/42      | 14                | 0.06419                               |
| 45                                                              | 1          | 10          | 236/70      | 6                 | 0.02961                               |
| 50                                                              | 1          | 4           | 235/60      | 1                 | 0.005135                              |
| 55                                                              | 2          | 50          | 186/40      | 90                | 0.1551                                |
| 90                                                              | 20         | 40          | 239/45      | 70                | 0.1551                                |
| 145                                                             | 1          | 30          | 257/30      | 80                | 0.1551                                |
| 145                                                             | 1          | 30          | 277/20      | 10                | 0.04735                               |
| 155                                                             | 1          | 50          | 240/44      | 80                | 0.1551                                |
| 205                                                             | 1          | 70          | 204/42      | 25                | 0.102125                              |
| 265                                                             | 1          | 15          | 075/36      | 9                 | 0.043065                              |
| 290                                                             | 1          | 20          | 060/45      | 15                | 0.068025                              |
| 300                                                             | 1          | 20          | 082/49      | 20                | 0.0857                                |
| 305                                                             | 1          | 20          | 080/50      | 15                | 0.068025                              |
| 305                                                             | 1          | 20          | 054/55      | 14                | 0.06419                               |

|     |    |    |        |     |          |
|-----|----|----|--------|-----|----------|
| 305 | 1  | 20 | 054/55 | 14  | 0.06419  |
| 310 | 1  | 25 | 088/44 | 10  | 0.04735  |
| 315 | 1  | 15 | 084/43 | 32  | 0.12112  |
| 343 | 1  | 15 | 216/66 | 3   | 0.015105 |
| 375 | 10 | 15 | 220/22 | 120 | 0.1551   |
| 380 | 2  | 40 | 199/09 | 180 | 0.1551   |
| 385 | 1  | 10 | 213/22 | 25  | 0.102125 |
| 385 | 1  | 10 | 208/17 | 40  | 0.1374   |
| 385 | 1  | 15 | 205/35 | 1   | 0.005135 |
| 385 | 1  | 40 | 195/12 | 1   | 0.005135 |
| 395 | 1  | 15 | 208/37 | 15  | 0.068025 |
| 445 | 1  | 15 | 060/60 | 40  | 0.1374   |
| 425 | 1  | 30 | 052/60 | 240 | 0.1551   |

**Supplementary Table II.** Structural data collected along a transect in the 16 m wide damage zone of fault LIF1.1, which are used to calculate the off-fault fracture energy ( $E_G^{Off-fault}$ ) required to create hybrid shear fractures and disaggregation bands in the damage zone (See the main text and (Supplementary Information IV for details).
